# Supplementary material
Source: publisher figshare collection journal article supplement (https://karger.figshare.com/articles/dataset/_/4535618)
Supplement: Supplementary file 1 [file 1]

Archive with 3 entries (3 files):
- Supplementary Table_legendes.doc
- HHE_201604005_1_8_Supplementary_Table_1.xlsx
- HHE_201604005_1_8_Supplementary_Table_1_PDF.PDF
