# Supplementary material
Source: publisher figshare collection journal article supplement (https://karger.figshare.com/articles/dataset/_/4535618)
Supplement: Supplementary file 1 [file 1 › HHE_201604005_1_8_Supplementary_Table_1.xlsx]

## Sheet: Sheet2
Prediction problem	Method	Title	Variables		Feature						Model
			Predictors	Response	static	dynamic	intensity	shape	local	global	supervised	unsupervised	cross-locus	cross-sample
Predicting TFBS	CENTIPEDE	Accurate inference of transcription factor binding from DNA sequence and chromatin accessibility data.	genome sequence, position weight matrices of TF motifs, proximity to the nearest transcription start site (TSS) and evolutionary sequence conservation Histone modifications ChIP-seq and DNase-seq	TFBS	ü	ü		ü	ü			ü	ü
	DNase2TF	DNase Footprint Signatures Are Dictated by Factor Dynamics and DNA Sequence.	genome sequence and position weight matrices of TF motifs DNase-seq	TFBS		ü		ü	ü			ü	ü
	PIQ	Discovery of directional and nondirectional pioneer transcription factors by modeling DNase profile magnitude and shape.	genome sequence and position weight matrices of TF motifs DNase-seq	TFBS	ü	ü	ü	ü	ü			ü	ü
	Chromia	Genome-wide prediction of transcription factor binding sites using an integrated model.	genome sequence and position weight matrices of TF motifs Histone modifications ChIP-seq	TFBS	ü	ü	ü		ü			ü	ü
	Ramsey et al.	Genome-wide histone acetylation data improve prediction of mammalian transcription factor binding sites.	genome sequence and position weight matrices of TF motifs Histone acetylation ChIP-seq	TFBS	ü	ü	ü		ü		ü		ü
	Cuellar-Partida et al.	Epigenetic priors for identifying active transcription factor binding sites.	genome sequence and position weight matrices of TF motifs Histone modifications ChIP-seq and DNase-seq	TFBS	ü	ü	ü		ü			ü	ü
	Arvey et al.	Sequence and chromatin determinants of cell-type–specific transcription factor binding.	DNA sequence K-mers Histone modifications ChIP-seq and DNase-seq	TFBS	ü	ü		ü	ü		ü		ü	ü
	Iterative CENTIPEDE	Which genetics variants in DNase-seq footprints are more likely to alter binding?	genome sequence, position weight matrices of TF motifs and SNPs DNase-seq	TFBS	ü	ü		ü	ü			ü	ü
	dPCA	Differential principal component analysis of ChIP-seq.	genome sequence and position weight matrices of TF motifs Histone modifications and CTCF ChIP-seq, DNase-seq and FAIRE-seq	Differential TFBS between two biological conditions	ü	ü	ü		ü			ü		ü
	BIRD (exon array)	Genome-wide prediction of DNase I hypersensitivity using gene expression.	genome sequence and position weight matrices of TF motifs Predicted DNase I hypersensitivity (based on Exon array)	TFBS	ü	ü	ü		ü			ü	ü
	BIRD (RNA-seq)	Global prediction of chromatin accessibility using RNA-seq from small number of cells.	genome sequence and position weight matrices of TF motifs Predicted DNase I hypersensitivity (based on RNA-seq)	TFBS	ü	ü	ü		ü			ü	ü
	Methylphet	Base-resolution methylation patterns accurately predict transcription factor bindings in vivo.	genome sequence and position weight matrices of TF motifs DNA methylation (whole-genome bisulfite sequencing)	TFBS	ü	ü		ü	ü		ü		ü
Predicting epigenome	ChromImpute	Large-scale imputation of epigenomic datasets for systematic annotation of diverse human tissues.	Various epigenomic data	Various epigenomic data		ü	ü		ü	ü	ü		ü	ü
	BIRD	Genome-wide prediction of DNase I hypersensitivity using gene expression.	Gene expression (exon array)	DNase-Seq		ü	ü			ü	ü			ü
	Zhang et al.	Predicting genome-wide DNA methylation using methylation marks, genomic position, and DNA regulatory elements.	DNA methylation from neighboring CpG sites, genomic position, DNA sequence properties and cis-regulatory elements	Whole-genome DNA methylation	ü	ü	ü		ü		ü		ü	ü
	Ma et al.	Predicting DNA methylation level across human tissues.	DNA methylation levels in surrogate tissue	DNA methylation level in target tissue		ü	ü		ü		ü			ü
	Bock et al.	CpG island methylation in human lymphocytes is highly correlated with DNA sequence, repeats, and predicted DNA structure.	DNA sequence patterns, repeat frequencies, and predicted DNA structure	CpG islands methylation status	ü	ü	ü	ü	ü		ü		ü
	hdfinder	Computational prediction of methylation status in human genomic sequences.	Genomic sequence features	Methylation on CpG regions	ü				ü		ü		ü
	Yuan	Targeted recruitment of histone modifications in humans predicted by genomic sequences.	Genomic sequence features	Location of histone modification marks	ü		ü		ü		ü		ü
	Epigram	Predicting the human epigenome from DNA motifs.	Genome sequence and DNA motifs	Histone modification and DNA methylation sites	ü		ü		ü			ü	ü
Predicting chromatin conformation	Huang et al.	Predicting chromatin organization using histone marks.	Histone modifications and CTCF ChIP-seq	chromatin interaction hubs and topologically associated domain boundaries		ü	ü		ü		ü		ü
	Fortin and Hansen	Reconstructing A/B compartments as revealed by hi-C using long-range correlations in epigenetic data.	DNA methylation (from Illumina 450k microarray), DNase-seq, single-cell ATAC-seq and single-cell whole-genome bisulfite sequencing	A/B compartments		ü	ü		ü			ü	ü
Predicting transcriptome	Ouyang et al.	ChIP-seq of transcription factors predicts absolute and differential gene expression in embryonic stem cells.	Transcription factor ChIP-seq	Gene expression		ü	ü			ü	ü		ü
	Natarajan et al.	Predicting cell-type-specific gene expression from regions of open chromatin.	Genome sequence and position weight matrices of TF motifs DNase-seq	Cell-type-specific expressed genes	ü	ü	ü			ü	ü		ü
	Karlić et al.	Histone modification levels are predictive for gene expression.	Histone modifications ChIP-seq	Gene expression values		ü	ü		ü		ü		ü	Results validated across different samples
	Dong et al.	Modeling gene expression using chromatin features in various cellular contexts.	Histone modifications ChIP-seq, DNase-seq and normalized CpG score	Binary gene expression and gene expression value		ü	ü		ü		ü		ü	Results validated across different samples
	Cheng et al.	A statistical framework for modeling gene expression using chromatin features and application to modENCODE datasets.	Histone modifications ChIP-seq	Gene exoression values		ü	ü		ü		ü		ü
