# Supplementary material
Source: publisher figshare collection journal article supplement (https://karger.figshare.com/articles/dataset/_/4535618)
Supplement: Supplementary file 1 [file 1 › HHE_201604005_1_8_Supplementary_Table_1_PDF.PDF]

| Prediction problem | Method                 | Title                                                                                                                    |
|--------------------|------------------------|--------------------------------------------------------------------------------------------------------------------------|
| Predicting TFBS    | CENTIPEDE              | Accurate inference of transcription factor binding from DNA sequence and chromatin accessibility data.                   |
|                    | DNase2TF               | DNase Footprint Signatures Are Dictated by Factor Dynamics and DNA Sequence.                                             |
|                    | PIQ                    | Discovery of directional and nondirectional pioneer transcription factors by modeling DNase profile magnitude and shape. |
|                    | Chromia                | Genome-wide prediction of transcription factor binding sites using an integrated model.                                  |
|                    | Ramsey et al.          | Genome-wide histone acetylation data improve prediction of mammalian transcription factor binding sites.                 |
|                    | Cuellar-Partida et al. | Epigenetic priors for identifying active transcription factor binding sites.                                             |
|                    | Arvey et al.           | Sequence and chromatin determinants of cell-type-specific transcription factor binding.                                  |
|                    | Iterative CENTIPEDE    | Which genetics variants in DNase-seq footprints are more likely to alter binding?                                        |

|                      |                          |                                                                                                                           |
|----------------------|--------------------------|---------------------------------------------------------------------------------------------------------------------------|
|                      | <b>dPCA</b>              | Differential principal component analysis of ChIP-seq.                                                                    |
|                      | <b>BIRD (exon array)</b> | Genome-wide prediction of DNase I hypersensitivity using gene expression.                                                 |
|                      | <b>BIRD (RNA-seq)</b>    | Global prediction of chromatin accessibility using RNA-seq from small number of cells.                                    |
|                      | <b>Methylphet</b>        | Base-resolution methylation patterns accurately predict transcription factor bindings in vivo.                            |
| Predicting epigenome | <b>ChromImpute</b>       | Large-scale imputation of epigenomic datasets for systematic annotation of diverse human tissues.                         |
|                      | <b>BIRD</b>              | Genome-wide prediction of DNase I hypersensitivity using gene expression.                                                 |
|                      | <b>Zhang et al.</b>      | Predicting genome-wide DNA methylation using methylation marks, genomic position, and DNA regulatory elements.            |
|                      | <b>Ma et al.</b>         | Predicting DNA methylation level across human tissues.                                                                    |
|                      | <b>Bock et al.</b>       | CpG island methylation in human lymphocytes is highly correlated with DNA sequence, repeats, and predicted DNA structure. |
|                      | <b>hdfinder</b>          | Computational prediction of methylation status in human genomic sequences.                                                |

|                                   |                   |                                                                                                                      |
|-----------------------------------|-------------------|----------------------------------------------------------------------------------------------------------------------|
|                                   | Yuan              | Targeted recruitment of histone modifications in humans predicted by genomic sequences.                              |
|                                   | Epigram           | Predicting the human epigenome from DNA motifs.                                                                      |
| Predicting chromatin conformation | Huang et al.      | Predicting chromatin organization using histone marks.                                                               |
|                                   | Fortin and Hansen | Reconstructing A/B compartments as revealed by hi-C using long-range correlations in epigenetic data.                |
| Predicting transcriptome          | Ouyang et al.     | ChIP-seq of transcription factors predicts absolute and differential gene expression in embryonic stem cells.        |
|                                   | Natarajan et al.  | Predicting cell-type-specific gene expression from regions of open chromatin.                                        |
|                                   | Karlić et al.     | Histone modification levels are predictive for gene expression.                                                      |
|                                   | Dong et al.       | Modeling gene expression using chromatin features in various cellular contexts.                                      |
|                                   | Cheng et al.      | A statistical framework for modeling gene expression using chromatin features and application to modENCODE datasets. |

| Variables                                                                                                                                                                                                  |          |        |         |
|------------------------------------------------------------------------------------------------------------------------------------------------------------------------------------------------------------|----------|--------|---------|
| Predictors                                                                                                                                                                                                 | Response | static | dynamic |
| genome sequence, position weight matrices of TF motifs, proximity to the nearest transcription start site (TSS) and evolutionary sequence conservation<br><br>Histone modifications ChIP-seq and DNase-seq | TFBS     | ✓      | ✓       |
| genome sequence and position weight matrices of TF motifs<br><br>DNase-seq                                                                                                                                 | TFBS     |        | ✓       |
| genome sequence and position weight matrices of TF motifs<br><br>DNase-seq                                                                                                                                 | TFBS     | ✓      | ✓       |
| genome sequence and position weight matrices of TF motifs<br><br>Histone modifications ChIP-seq                                                                                                            | TFBS     | ✓      | ✓       |
| genome sequence and position weight matrices of TF motifs<br><br>Histone acetylation ChIP-seq                                                                                                              | TFBS     | ✓      | ✓       |
| genome sequence and position weight matrices of TF motifs<br><br>Histone modifications ChIP-seq and DNase-seq                                                                                              | TFBS     | ✓      | ✓       |
| DNA sequence K-mers<br><br>Histone modifications ChIP-seq and DNase-seq                                                                                                                                    | TFBS     | ✓      | ✓       |
| genome sequence, position weight matrices of TF motifs and SNPs<br><br>DNase-seq                                                                                                                           | TFBS     | ✓      | ✓       |

|                                                                                                                                   |                                                     |   |   |
|-----------------------------------------------------------------------------------------------------------------------------------|-----------------------------------------------------|---|---|
| genome sequence and position weight matrices of TF motifs<br><br>Histone modifications and CTCF ChIP-seq, DNase-seq and FAIRE-seq | Differential TFBS between two biological conditions | ✓ | ✓ |
| genome sequence and position weight matrices of TF motifs<br><br>Predicted DNase I hypersensitivity (based on Exon array)         | TFBS                                                | ✓ | ✓ |
| genome sequence and position weight matrices of TF motifs<br><br>Predicted DNase I hypersensitivity (based on RNA-seq)            | TFBS                                                | ✓ | ✓ |
| genome sequence and position weight matrices of TF motifs<br><br>DNA methylation (whole-genome bisulfite sequencing)              | TFBS                                                | ✓ | ✓ |
| Various epigenomic data                                                                                                           | Various epigenomic data                             |   | ✓ |
| Gene expression (exon array)                                                                                                      | DNase-Seq                                           |   | ✓ |
| DNA methylation from neighboring CpG sites, genomic position, DNA sequence properties and cis-regulatory elements                 | Whole-genome DNA methylation                        | ✓ | ✓ |
| DNA methylation levels in surrogate tissue                                                                                        | DNA methylation level in target tissue              |   | ✓ |
| DNA sequence patterns, repeat frequencies, and predicted DNA structure                                                            | CpG islands methylation status                      | ✓ | ✓ |
| Genomic sequence features                                                                                                         | Methylation on CpG regions                          | ✓ |   |

|                                                                                                                                    |                                                                           |   |   |
|------------------------------------------------------------------------------------------------------------------------------------|---------------------------------------------------------------------------|---|---|
| Genomic sequence features                                                                                                          | Location of histone modification marks                                    | ✓ |   |
| Genome sequence and DNA motifs                                                                                                     | Histone modification and DNA methylation sites                            | ✓ |   |
| Histone modifications and CTCF ChIP-seq                                                                                            | chromatin interaction hubs and topologically associated domain boundaries |   | ✓ |
| DNA methylation (from Illumina 450k microarray), DNase-seq, single-cell ATAC-seq and single-cell whole-genome bisulfite sequencing | A/B compartments                                                          |   | ✓ |
| Transcription factor ChIP-seq                                                                                                      | Gene expression                                                           |   | ✓ |
| Genome sequence and position weight matrices of TF motifs<br><br>DNase-seq                                                         | Cell-type-specific expressed genes                                        | ✓ | ✓ |
| Histone modifications ChIP-seq                                                                                                     | Gene expression values                                                    |   | ✓ |
| Histone modifications ChIP-seq, DNase-seq and normalized CpG score                                                                 | Binary gene expression and gene expression value                          |   | ✓ |
| Histone modifications ChIP-seq                                                                                                     | Gene expression values                                                    |   | ✓ |

| Feature   |       |       |        | Model      |              |             |
|-----------|-------|-------|--------|------------|--------------|-------------|
| intensity | shape | local | global | supervised | unsupervised | cross-locus |
|           | ✓     | ✓     |        |            | ✓            | ✓           |
|           | ✓     | ✓     |        |            | ✓            | ✓           |
| ✓         | ✓     | ✓     |        |            | ✓            | ✓           |
| ✓         |       | ✓     |        |            | ✓            | ✓           |
| ✓         |       | ✓     |        | ✓          |              | ✓           |
| ✓         |       | ✓     |        |            | ✓            | ✓           |
|           | ✓     | ✓     |        | ✓          |              | ✓           |
|           | ✓     | ✓     |        |            | ✓            | ✓           |

|   |   |   |   |   |   |   |
|---|---|---|---|---|---|---|
| ✓ |   | ✓ |   |   | ✓ |   |
| ✓ |   | ✓ |   |   | ✓ | ✓ |
| ✓ |   | ✓ |   |   | ✓ | ✓ |
|   | ✓ | ✓ |   | ✓ |   | ✓ |
| ✓ |   | ✓ | ✓ | ✓ |   | ✓ |
| ✓ |   |   | ✓ | ✓ |   |   |
| ✓ |   | ✓ |   | ✓ |   | ✓ |
| ✓ |   | ✓ |   | ✓ |   |   |
| ✓ | ✓ | ✓ |   | ✓ |   | ✓ |
|   |   | ✓ |   | ✓ |   | ✓ |

|   |  |   |   |   |   |   |
|---|--|---|---|---|---|---|
| ✓ |  | ✓ |   | ✓ |   | ✓ |
| ✓ |  | ✓ |   |   | ✓ | ✓ |
| ✓ |  | ✓ |   | ✓ |   | ✓ |
| ✓ |  | ✓ |   |   | ✓ | ✓ |
| ✓ |  |   | ✓ | ✓ |   | ✓ |
| ✓ |  |   | ✓ | ✓ |   | ✓ |
| ✓ |  | ✓ |   | ✓ |   | ✓ |
| ✓ |  | ✓ |   | ✓ |   | ✓ |
| ✓ |  | ✓ |   | ✓ |   | ✓ |

|  | cross-sample |
|--|--------------|
|  |              |
|  |              |
|  |              |
|  |              |
|  |              |
|  |              |
|  | ✓            |
|  |              |

|   |
|---|
| ✓ |
|   |
|   |
|   |
| ✓ |
| ✓ |
| ✓ |
| ✓ |
|   |
|   |

|                                                     |
|-----------------------------------------------------|
|                                                     |
|                                                     |
|                                                     |
|                                                     |
|                                                     |
|                                                     |
| Results<br>validated<br>across different<br>samples |
| Results<br>validated<br>across different<br>samples |
|                                                     |
